# Supplementary material for: Effectiveness of Deep Hyperthermia Combined with Dynamic Traction in the Treatment of Knee Osteoarthritis
Source: Research Square preprint supplement (doi:10.21203/rs.3.rs-151216/v1), 2021-02-01
Supplement: Supplementary file 1 [file 678909f3fc6d421a9eb07896.pdf]

**Effectiveness of deep hyperthermia combined with dynamic traction in the treatment of knee osteoarthritis**

Lichun Wang<sup>1\*</sup>

E-mail: Wanglichun1976@163.com

Liu Lv<sup>2</sup>

E-mail: pan1227liu@163.com

Hongli Zhang<sup>1</sup>

E-mail: q13832710133@163.com

Hua Chen<sup>3</sup>

E-mail: chenhua811025@126.com

Fei Li<sup>1</sup>

E-mail: 924213323@qq.com

Jianyong Zhao<sup>4</sup>

E-mail: zhaojyvip@126.com

Kaixuan Yao<sup>2</sup>

E-mail: 192332426@qq.com

Xiaochen Feng<sup>2</sup>

E-mail: 972366020@qq.com

<sup>1</sup>Department of Neurorehabilitation, Rehabilitation Hospital Area of Cangzhou Integrated Traditional Chinese and Western Medicine Hospital, Cangzhou, Hubei, China

<sup>2</sup>Rehabilitation Department, Rehabilitation Hospital Area of Cangzhou Integrated Traditional Chinese and Western Medicine Hospital, Cangzhou, Hubei, China

<sup>3</sup>Seven Orthopedic Departments, Cangzhou Integrated Traditional Chinese and Western Medicine Hospital, Cangzhou, Hubei, China

<sup>4</sup>Dean, Cangzhou Integrated traditional Chinese and Western Medicine Hospital,  
Cangzhou, Hubei, China

**\*Corresponding Author:**

Lichun Wang

Department of Neurorehabilitation, Rehabilitation Hospital Area of Cangzhou  
Integrated Traditional Chinese and Western Medicine Hospital, Cangzhou, Hubei,  
China

Tel: +86-18031783966

E-mail: Wanglichun1976@163.com

**Supplementary Table 1.** Alder classification criteria

| Grade | Ultrasound manifestations                                                                                           |
|-------|---------------------------------------------------------------------------------------------------------------------|
| 0     | With no color blood flow signal.                                                                                    |
| 1     | With few (1–2) dotty blood flow signals.                                                                            |
| 2     | With 3–4 dotty blood flow signals, or short linear signal, and distributed over less than 1/2 of the synovium area. |
| 3     | With rich branchy or reticular blood flow signals, and distributed over 1/2 of the synovium area.                   |
